# Supplementary material for: GPS-SNO: Computational Prediction of Protein S-Nitrosylation Sites with a Modified GPS Algorithm
Source: PLoS One. 2010 Jun 24;5(6):e11290. doi: 10.1371/journal.pone.0011290 (PMC2892008; doi:10.1371/journal.pone.0011290)
Supplement: Table S1 — From the scientific literature (PubMed) and the UniProt database, we collected 504 experimentally verified S-nitrosylation sites in 327 unique proteins. All of the sites from UniProt were complemented by the data taken from PubMed (marked in grey). (0.07 MB XLS) [file pone.0011290.s002.xls]

## Sheet: Table S1
Table S1 – From the scientific literature (PubMed) and the UniProt database, we collected 504 experimentally verified S-nitrosylation sites in 327 unique proteins. All of the sites from UniProt were complemented by the data taken from PubMed (marked in grey).
UniProt	Position	Organism	PMID
P23686	114	A. thaliana	16365035
P27140	280	A. thaliana	19017644
P93002	156	A. thaliana	18635760
Q949U7	121	A. thaliana	18165327
Q9FYE1	147	A. thaliana	17110382
P52197	230	A. vinelandii	12821142
P00586	248	B. taurus	12962704
P02769	58	B. taurus	11983891;12706341;17135341;18273439
P02769	288	B. taurus	17661312
P02769	392	B. taurus	17661312
P02769	471	B. taurus	17661312
P00784	158	C. papaya	15927266
P00561	280	E. coli	19483679
P00561	501	E. coli	19483679
P00888	250	E. coli	19483679
P05793	45	E. coli	19483679
P07014	75	E. coli	19483679
P08142	298	E. coli	19483679
P08839	324	E. coli	19483679
P09373	123	E. coli	19483679
P0A6K6	267	E. coli	19483679
P0A6L2	218	E. coli	19483679
P0A7L8	53	E. coli	19483679
P0A7M2	5	E. coli	19483679
P0A7M9	16	E. coli	19483679
P0A7M9	18	E. coli	19483679
P0A7M9	37	E. coli	19483679
P0A7Q1	61	E. coli	19483679
P0A7S3	27	E. coli	19483679
P0A7V8	32	E. coli	19483679
P0A7Z4	176	E. coli	19483679
P0A853	298	E. coli	19483679
P0A862	82	E. coli	19483679
P0A9P0	392	E. coli	19483679
P0A9X4	113	E. coli	19483679
P0AC53	10	E. coli	19483679
P0ACQ4	199	E. coli	14993439;15688001
P0AFC7	102	E. coli	19483679
P0AG44	100	E. coli	19483679
P0AGE9	124	E. coli	19483679
P0C8J6	124	E. coli	19483679
P0C8J8	149	E. coli	19483679
P0C8J8	159	E. coli	19483679
P13033	284	E. coli	19483679
P17117	9	E. coli	19483679
P28903	466	E. coli	19483679
P29680	50	E. coli	19483679
P32132	537	E. coli	19483679
P33937	67	E. coli	19483679
P60422	6	E. coli	19483679
P60422	188	E. coli	19483679
P63389	602	E. coli	19483679
P64463	52	E. coli	19483679
P68066	31	E. coli	19483679
P76243	5	E. coli	19483679
P77252	9	E. coli	19483679
P03206	189	Epstein-Barr virus	16227252
O00220	336	H. sapiens	16847314
O14920	179	H. sapiens	15184672;15688001
O14983	344	H. sapiens	10493809
O14983	349	H. sapiens	10493809
O15519	254	H. sapiens	16246840
O15519	259	H. sapiens	16246840
O94760	222	H. sapiens	12441345
O94760	274	H. sapiens	12441345
P00403	196	H. sapiens	15561762
P00403	200	H. sapiens	15561762
P00533	190	H. sapiens	19056486
P00533	329	H. sapiens	19056486
P00750	118	H. sapiens	1325644
P00966	132	H. sapiens	15192091;15688001
P01009	256	H. sapiens	10673391
P01111	118	H. sapiens	18641128
P02766	10	H. sapiens	16101296
P04271	85	H. sapiens	15590070
P05062	269	H. sapiens	15683743
P05089	168	H. sapiens	17704205
P05089	303	H. sapiens	17704205
P05109	42	H. sapiens	18832721
P05161	78	H. sapiens	18606809
P06213	1083	H. sapiens	11225731
P06213	1165	H. sapiens	11225731
P06213	1261	H. sapiens	11225731
P06213	1272	H. sapiens	11225731
P06741	181	H. sapiens	19452190
P06753-2	170	H. sapiens	18992711;19447776
P07237	53	H. sapiens	16724068
P07237	56	H. sapiens	16724068
P07237	397	H. sapiens	16724068
P07237	400	H. sapiens	16724068
P07900	481	H. sapiens	17629318
P07900	597	H. sapiens	15937123
P07900	598	H. sapiens	15937123
P08670	328	H. sapiens	19447776
P10242	130	H. sapiens	9541005
P10415	158	H. sapiens	16980304
P10415	229	H. sapiens	16980304
P10599	62	H. sapiens	17260951
P10599	69	H. sapiens	15688001;16220319;17260951;18497292;18544525
P10599	73	H. sapiens	17260951;18497292;18544525;18635375
P10620	50	H. sapiens	15683743
P11926	360	H. sapiens	11461922
P13639	41	H. sapiens	19101475
P13639	567	H. sapiens	16648260
P14780	99	H. sapiens	12183632
P15121	299	H. sapiens	19061876
P18031	32	H. sapiens	18840608
P18031	92	H. sapiens	18840608
P18031	215	H. sapiens	17532511;18840608
P19838	61	H. sapiens	15688001;16099468
P20337	184	H. sapiens	16648260
P21817	35	H. sapiens	17071618
P21817	252	H. sapiens	17071618
P21817	314	H. sapiens	17071618
P21817	810	H. sapiens	17071618
P21817	905	H. sapiens	17071618
P21817	1039	H. sapiens	17071618
P21817	1302	H. sapiens	17071618
P21817	1590	H. sapiens	17071618
P21817	2326	H. sapiens	17071618
P21817	2363	H. sapiens	17071618
P21817	3193	H. sapiens	17071618
P21817	3635	H. sapiens	11562475;12509428;15688001;17071618
P21980	10	H. sapiens	11305905
P21980	27	H. sapiens	11305905
P21980	98	H. sapiens	11305905
P21980	143	H. sapiens	11305905
P21980	230	H. sapiens	11305905
P21980	269	H. sapiens	11305905
P21980	277	H. sapiens	11305905
P21980	285	H. sapiens	11305905
P21980	336	H. sapiens	11305905
P21980	370	H. sapiens	11305905
P21980	371	H. sapiens	11305905
P21980	524	H. sapiens	11305905
P21980	545	H. sapiens	11305905
P21980	620	H. sapiens	11305905
P22460	331	H. sapiens	16876149
P22460	346	H. sapiens	16876149
P23284	202	H. sapiens	16648260
P23975	351	H. sapiens	10882390
P27348	25	H. sapiens	16648260
P27348	134	H. sapiens	19101475
P27816	635	H. sapiens	16648260
P29350	453	H. sapiens	15684422
P29474	94	H. sapiens	15774480;17941803
P29474	99	H. sapiens	16081307;17941803
P29474	184	H. sapiens	16081307
P29474	201	H. sapiens	16081307
P29474	212	H. sapiens	16081307
P29474	661	H. sapiens	17941803
P29474	802	H. sapiens	17941803
P29474	853	H. sapiens	17941803
P29474	976	H. sapiens	17941803
P29474	991	H. sapiens	17941803
P29474	1048	H. sapiens	17941803
P29474	1050	H. sapiens	17941803
P29474	1114	H. sapiens	17941803
P30556	289	H. sapiens	16565729
P31749	224	H. sapiens	15632167
P31749	296	H. sapiens	16041729
P31749	310	H. sapiens	16041729
P35247	35	H. sapiens	19007302
P35247	40	H. sapiens	19007302
P35557	371	H. sapiens	12707306;15688001
P35579	91	H. sapiens	16648260
P35579	896	H. sapiens	16648260
P35579	917	H. sapiens	16648260
P35754	8	H. sapiens	17355958
P35754	79	H. sapiens	17355958
P35754	83	H. sapiens	17355958
P38646	487	H. sapiens	16648260
P40227	406	H. sapiens	16648260
P42574	163	H. sapiens	9034139
P43235	139	H. sapiens	10521264
P45983	116	H. sapiens	11121042;15688001
P46459	21	H. sapiens	14567912
P46459	91	H. sapiens	14567912;15944123
P46459	250	H. sapiens	16418269
P46459	264	H. sapiens	14567912
P47712	151	H. sapiens	18029351
P48039	127	H. sapiens	15978051
P48039	130	H. sapiens	15978051
P48200	178	H. sapiens	14673166;15688001;16479012
P50570	27	H. sapiens	17251380
P50570	86	H. sapiens	17251380
P50570	607	H. sapiens	17251380
P50995	294	H. sapiens	16648260
P51787	445	H. sapiens	19124472
P68036	86	H. sapiens	19483679
P68104	234	H. sapiens	16648260
P68104	411	H. sapiens	19101475;19483679
P69905	105	H. sapiens	17350155
P98170	12	H. sapiens	19273858
P98170	90	H. sapiens	19273858
P98170	213	H. sapiens	19273858
P98170	300	H. sapiens	19273858
P98170	303	H. sapiens	19273858
P98170	327	H. sapiens	19273858
P98170	351	H. sapiens	19273858
Q00987	77	H. sapiens	15688001
Q04206	38	H. sapiens	17720813
Q05586	744	H. sapiens	9182795;12183209;17196530;17434127
Q05586	798	H. sapiens	9182795;12183209;17196530;17434127
Q12879	87	H. sapiens	12183209;17196530;17434127
Q12879	320	H. sapiens	12183209;17196530;17434127
Q12879	399	H. sapiens	10571239;10607390;11092448;12183209;15688001;17434127
Q16623	145	H. sapiens	18452404
Q16665	520	H. sapiens	17434127
Q16665	800	H. sapiens	15023551;15688001
Q4KKW9	201	H. sapiens	11890743
Q4KKW9	317	H. sapiens	11890743
Q567R4	133	H. sapiens	16648260
Q5SWX2	85	H. sapiens	16648260
Q8IXZ9	245	H. sapiens	16648260
Q8WX93	964	H. sapiens	16648260
Q92769	262	H. sapiens	18754010;19047631
Q92769	274	H. sapiens	18754010;19047631
Q99683	869	H. sapiens	14668338;15688001
Q99836	113	H. sapiens	18086890
Q99836	216	H. sapiens	18086890
Q9GZT4	113	H. sapiens	17293453
Q9UL62	553	H. sapiens	16998480;17051229
Q9UL62	558	H. sapiens	16998480;17051229
Q9UQM7	6	H. sapiens	18271754
Q9UQM7	280	H. sapiens	19101475
Q9Y272	11	H. sapiens	12498886;15688001
Q9Y696	234	H. sapiens	16648260
P03369	557	HIV type 1	9784385;11572774
P03369	585	HIV type 1	9784385;11572774
O08709	47	M. musculus	19101475
O08997	41	M. musculus	19483679
O55229	72	M. musculus	19101475
O70145	291	M. musculus	19483679
O70251	50	M. musculus	19483679
O70370	281	M. musculus	19483679
O70370	329	M. musculus	19483679
O70370	335	M. musculus	19483679
P00493	106	M. musculus	19101475
P03995	291	M. musculus	19101475
P05064	339	M. musculus	19101475
P05202	187	M. musculus	19483679
P08551	323	M. musculus	19101475
P10637	614	M. musculus	19101475
P12658	100	M. musculus	19101475
P12979	61	M. musculus	17519233
P12979	65	M. musculus	17519233
P12979	70	M. musculus	17519233
P14131	25	M. musculus	19101475
P14873	1913	M. musculus	19101475
P14873	1936	M. musculus	19101475
P14873	2357	M. musculus	17704770
P14873	2460	M. musculus	17704770
P17918	135	M. musculus	19483679
P17918	162	M. musculus	19483679
P19246	225	M. musculus	19101475
P19246	263	M. musculus	19101475
P27659	114	M. musculus	19101475
P28651	201	M. musculus	16418269;19101475
P28663	103	M. musculus	16418269
P46660	54	M. musculus	19101475
P47738	68	M. musculus	19483679
P47738	321	M. musculus	16242127
P47955	61	M. musculus	19483679
P51859	12	M. musculus	19101475
P57776	217	M. musculus	19483679
P60710	217	M. musculus	19101475
P60710	257	M. musculus	18283105
P60710	272	M. musculus	18283105
P60710	285	M. musculus	18283105
P60710	374	M. musculus	18283105
P61080	85	M. musculus	19101475
P61979	132	M. musculus	19483679
P62754	12	M. musculus	19101475;19483679
P62761	87	M. musculus	19101475
P62761	187	M. musculus	19101475
P62830	28	M. musculus	19101475
P62858	27	M. musculus	19101475
P63085	159	M. musculus	19101475;19483679
P63242	73	M. musculus	19101475
P63276	35	M. musculus	19101475
P63318	296	M. musculus	16418269
P68404	217	M. musculus	19101475
P68510	112	M. musculus	19101475
P70296	133	M. musculus	19483679
P70310	153	M. musculus	16418269
P80318	213	M. musculus	19483679
P84086	90	M. musculus	19101475
P84086	105	M. musculus	19101475
P97494	501	M. musculus	19101475
Q05816	43	M. musculus	19483679
Q05816	120	M. musculus	19483679
Q05816	127	M. musculus	19483679
Q07076	338	M. musculus	19483679
Q3U0V1	297	M. musculus	19101475
Q60676	77	M. musculus	19101475
Q60864	26	M. musculus	19483679
Q60864	461	M. musculus	19101475
Q61074	13	M. musculus	19101475
Q61233	31	M. musculus	19483679
Q61990	109	M. musculus	19483679
Q61990	158	M. musculus	19483679
Q62418	127	M. musculus	19101475
Q64339	76	M. musculus	18606809
Q64339	144	M. musculus	18606809
Q64467	351	M. musculus	19101475
Q6ZPY7	1187	M. musculus	19483679
Q6ZWV3	105	M. musculus	19101475
Q76MZ3	390	M. musculus	19101475;19483679
Q7TMK9	96	M. musculus	19101475
Q80UJ7	322	M. musculus	19101475
Q8BP47	277	M. musculus	19483679
Q8BUV3	284	M. musculus	19101475
Q8BWF0	422	M. musculus	16418269
Q8CI94	437	M. musculus	19101475
Q91VI7	80	M. musculus	19483679
Q91VI7	404	M. musculus	19483679
Q920E5	332	M. musculus	19483679
Q99KI0	385	M. musculus	19101475
Q99MK8	72	M. musculus	17482545
Q99MK8	120	M. musculus	17482545
Q99MK8	340	M. musculus	17482545
Q99MK8	439	M. musculus	17482545
Q99MK8	619	M. musculus	17482545
Q9CQN1	135	M. musculus	19483679
Q9CZC8	324	M. musculus	19101475
Q9D6M3	52	M. musculus	16418269
Q9D6M3	271	M. musculus	16418269
Q9D7S9	20	M. musculus	19101475
Q9EQQ9	596	M. musculus	19101475
Q9JHU4	631	M. musculus	19101475
Q9JIF0	272	M. musculus	19483679
Q9QUR7	115	M. musculus	16418269
Q9QYC0	525	M. musculus	19101475
Q9QZ06	229	M. musculus	19101475
Q9R0P5	23	M. musculus	19101475
Q9WTX5	120	M. musculus	19101475
Q9WTX5	160	M. musculus	19101475
Q9I4E3	249	P. aeruginosa	10510241;12370443;15688001
P13448	113	R. erythropolis	9368004
O35433	616	R. norvegicus	16998480
O35433	621	R. norvegicus	16998480
O35831	233	R. norvegicus	16418269
O55081	50	R. norvegicus	19101475
O88506	533	R. norvegicus	19101475
O88600	417	R. norvegicus	19101475
O88767	46	R. norvegicus	16316629
O88767	53	R. norvegicus	16316629
O88767	106	R. norvegicus	16418269
O88767	121	R. norvegicus	16418269
P04642	163	R. norvegicus	17629318
P04904	212	R. norvegicus	19101475
P04905	87	R. norvegicus	19101475
P04906	48	R. norvegicus	16418269
P04906	102	R. norvegicus	19101475
P05065	202	R. norvegicus	17629318
P06687	49	R. norvegicus	16418269
P06687	364	R. norvegicus	16418269
P06687	695	R. norvegicus	16418269
P07323	270	R. norvegicus	19101475
P07323	357	R. norvegicus	19101475
P09605	317	R. norvegicus	16418269
P09606	269	R. norvegicus	19101475
P10111	161	R. norvegicus	17629318
P11506	487	R. norvegicus	16418269
P11506	497	R. norvegicus	16418269
P11506	571	R. norvegicus	16418269
P11517	94	R. norvegicus	19101475
P11517	126	R. norvegicus	19101475
P13221	83	R. norvegicus	19101475
P13444	121	R. norvegicus	10358060;15688001
P17425	417	R. norvegicus	19101475
P19686	243	R. norvegicus	17636120;18669924
P20595	122	R. norvegicus	17636120;18669924
P20651	478	R. norvegicus	19101475
P24942	186	R. norvegicus	16418269
P25113	55	R. norvegicus	17629318
P25113	153	R. norvegicus	19101475;19483679
P29067	410	R. norvegicus	18691971
P29101	293	R. norvegicus	16418269
P29147	221	R. norvegicus	16418269
P30033	140	R. norvegicus	16418269
P30427	4316	R. norvegicus	17224453
P30713	50	R. norvegicus	16418269;19101475
P31596	562	R. norvegicus	16418269
P34926	160	R. norvegicus	19101475
P34926	978	R. norvegicus	19101475
P34926	1236	R. norvegicus	19101475
P47860	81	R. norvegicus	16418269
P47942	248	R. norvegicus	17629318
P47942	504	R. norvegicus	16418269;17629318
P48500	21	R. norvegicus	16418269
P48500	27	R. norvegicus	16418269
P48500	67	R. norvegicus	19101475
P48500	159	R. norvegicus	19101475
P48768	537	R. norvegicus	16418269
P50398	317	R. norvegicus	17629318
P56558	610	R. norvegicus	16418269
P60203	201	R. norvegicus	16418269
P61765	110	R. norvegicus	16418269
P62260	192	R. norvegicus	17629318
P62703	41	R. norvegicus	19101475
P62815	162	R. norvegicus	16418269
P63018	574	R. norvegicus	17629318
P63018	603	R. norvegicus	17629318
P63102	25	R. norvegicus	17629318
P63102	94	R. norvegicus	16418269;17629318
P63329	228	R. norvegicus	16418269
P68370	295	R. norvegicus	16418269
P68370	315	R. norvegicus	17629318
P68370	316	R. norvegicus	17629318
P68370	347	R. norvegicus	17629318
P68370	376	R. norvegicus	17629318
P69897	12	R. norvegicus	16418269
P69897	239	R. norvegicus	16418269
P69897	303	R. norvegicus	16418269
P69897	354	R. norvegicus	16418269
P84076	38	R. norvegicus	16418269
P84076	185	R. norvegicus	19101475
Q00195	460	R. norvegicus	10809749;15688001
Q00981	152	R. norvegicus	16418269
Q02293	299	R. norvegicus	16418269
Q05683	45	R. norvegicus	16418269
Q05962	160	R. norvegicus	16418269
Q05962	257	R. norvegicus	16418269
Q07009	301	R. norvegicus	16418269
Q08163	92	R. norvegicus	19101475
Q09429	717	R. norvegicus	19284878
Q5HZV9	112	R. norvegicus	19101475
Q5U2N3	259	R. norvegicus	19101475
Q66HA8	34	R. norvegicus	19101475
Q8VBU0	47	R. norvegicus	16418269
Q9JK11	403	R. norvegicus	19101475
Q9QX80	104	R. norvegicus	14722087
P25372	92	S. cerevisiae	19166985
P33198	305	S. scrofa	12361803;14551203
P33198	387	S. scrofa	12361803;14551203
Q9DGJ2	10	T. alalunga	17488722
P25779	147	T. cruzi	10753643
P11442	870	R. norvegicus	16418269
P11442	151	R. norvegicus	16418269;18335467;19366988
Q91V92	20	M. musculus	18335467;19101475;19366988
O00429	367	H. sapiens	19101475
O00429	644	H. sapiens	19342591;19417214
P11980	49	R. norvegicus	17629318;18335467;19366988
P11980	326	R. norvegicus	19101475
P11980	358	R. norvegicus	16418269
P11980	423	R. norvegicus	17629318
P11980	474	R. norvegicus	17629318
P04797	23	R. norvegicus	17629318
P04797	150	R. norvegicus	7902582;16418269;18335467;19366988
P04797	154	R. norvegicus	16418269;18335467;19366988
P04797	245	R. norvegicus	16418269;17629318;18335467;19366988
P07335	254	R. norvegicus	17629318;18335467;19366988
P07335	283	R. norvegicus	16418269
O88989	137	R. norvegicus	17629318;18335467;19366988
O88989	154	R. norvegicus	17629318
P14869	119	M. musculus	18335467;19483679;19366988
Q06830	52	H. sapiens	15683743
Q06830	173	H. sapiens	15683743;18335467;19366988
P62908	97	M. musculus	16418269;18335467;19366988
P18760	139	M. musculus	18335467;19101475;19366988
P23297	86	H. sapiens	15590070
P10809	237	H. sapiens	16418269;18335467;19366988
P10809	442	H. sapiens	18335467;19366988
P10809	447	H. sapiens	18335467;19366988
P17987	147	H. sapiens	18335467;19483679;19366988
P17987	357	H. sapiens	18335467;19366988
O43175	281	H. sapiens	18335467;19366988
O43175	369	H. sapiens	18335467;19101475;19483679;19366988
P36578	96	H. sapiens	18335467;19101475;19366988
P36578	208	H. sapiens	18335467;19366988
P36578	250	H. sapiens	18335467;19366988
P00558	50	H. sapiens	17629318;18335467;19366988
P00558	108	H. sapiens	18335467;19366988
O95573	450	H. sapiens	18335467;19366988
P09382	61	H. sapiens	18335467;19366988
P12814	332	H. sapiens	18335467;19366988
P14854	54	H. sapiens	18335467;19366988
P21333	717	H. sapiens	18335467;19366988
P26641	194	H. sapiens	18335467;19366988
P30046	24	H. sapiens	18335467;19366988
P30048	229	H. sapiens	18335467;19366988
P30050	141	H. sapiens	18335467;19366988
P31327	600	H. sapiens	18335467;19366988
P31949	13	H. sapiens	18335467;19366988
P41567	69	H. sapiens	18335467;19366988
P43243	806	H. sapiens	18335467;19366988
P45880	76	H. sapiens	18335467;19366988
P46782	155	H. sapiens	18335467;19366988
P46782	172	H. sapiens	18335467;19366988
P49327	1471	H. sapiens	18335467;19366988
P61247	201	H. sapiens	18335467;19366988
P62241	100	H. sapiens	18335467;19366988
P62280	131	H. sapiens	18335467;19366988
P62826	112	H. sapiens	18335467;19366988
P62826	120	H. sapiens	18335467;19366988
P62888	52	H. sapiens	18335467;19366988
P62888	92	H. sapiens	18335467;19366988
P63244	249	H. sapiens	18335467;19366988
Q13838	165	H. sapiens	18335467;19366988
Q8NBI5	226	H. sapiens	18335467;19366988
Q9BUJ2	377	H. sapiens	18335467;19366988
Q9BUJ2	487	H. sapiens	18335467;19366988
